# Supplementary material
Source: Springer Nature journal article supplement (https://www.springermedizin.de/resource/supplementary/13023_2011_386_MOESM2_ESM.pdf/9642220)
Supplement: MOESM2 [file 9642220]

**Diagnosis workup of an IEM-linked hypoglycaemia in adults**

Glycaemia < 0.55 g/L or 3mmol/L (venous sample))

Usual causes ?

- Drugs**  
**Malicious hypoglycaemia**  
**Antibody to insulin**  
**Antibody to insulin receptor**  
**Alcohol**  
**Cortisol (GH) deficiency**  
**Cachexia, Sepsis**  
**Hepatic, renal or cardiac failure**  
**IGF-2 or big-IGF-2 by mesenchymal tumors**

Timeline ?

Fasting

Postprandial

Exercise-induced

no suspicion IEM

suspicion IEM

Investigations (4)

Reactive Hypoglycaemia ? (6)

Suspicion Inherited Fructose Intolerance ?

Fasting-test (2)

hypoglycaemia

insulinoma (3)

no insulinoma

normal (5)

GSD suspicion ?  
oral glucose tolerance test with lactates levels

Metabolic Fasting-test (up to 48 or 72h if no abnormalities)

yes

no

Molecular diagnosis

Mixed-meal test

Exercise test

**Muscle symptom**  
**CPK (high)**  
**Ketone -**  
**Free Fatty Acid (FFA) +++**  
**(FFA/βOH butyrate > 2.5)**

**Alanine +++**  
**Glycerol +++**  
**Lactates ++**  
**Ketones +**

**Hepatomegaly**  
**Lactates ++**  
**Ketones +**

**ENDOGENOUS HYPERINSULINISM (3)**

**FAO DISORDER**

**GLUCONEOGENESIS DISORDER**

**GLYCOGENOLYSIS DISORDER**

**INHERITED FRUCTOSE INTOLERANCE**

**- NIPHS**  
**Glucokinase activating mutation ? (SUR1/Kir6.2, SCHAD, GDH in adult ?)**  
**- CDG Id (Ia, Ib in adult ?)**

**MCT1**

GSD: glycogen storage disease; FAO: defects of fatty acid oxidation; NIPHS: non-insulinoma pancreatogenic hypoglycaemia syndrome; MCT 1: monocarboxylate transporter 1.
